# Supplementary material
Source: PubMed Central journal article supplement (PMC5600857)
Supplement: NIHMS894836-supplement-2.pdf [file NIHMS894836-supplement-2.pdf]

Supplementary Table 1. Primers used for qRT-PCR and ChIP assays.

**pre-tRNA qPCR, tRNA ChIP**

| Target tRNA | Primer name   | Sequence 5' --> 3'       |
|-------------|---------------|--------------------------|
| Arg-TCT-1-1 | Arg-TCT-F     | GTGGCGCAATGGATAGC        |
|             | Arg-TCT-1-1-R | CTTCCTTTGAATGCCTTCAGC    |
| Ile-TAT-2-2 | Ile-TAT-F     | GTGGCGCAATCGGTTAGC       |
|             | Ile-TAT-2-2-R | GCATCACTCGCACACATACTG    |
| Leu-CAA-2-1 | Leu-CAA-F     | ATGGCCGAGTGGTCTAAGG      |
|             | Leu-CAA-2-1-R | ACCAGAAGACCCGAACACAG     |
| Met-CAT-1-1 | Met-CAT-1-1 F | GCCTCGTTAGCGCAGTAG       |
|             | Met-CAT-1-1 R | CTCACGACCTTCAGATTATG     |
| Tyr-GTA-5-1 | Tyr-GTA-5-F   | CCTTCGATAGCTCAGCTGGT     |
|             | Tyr-GTA-5-1-R | GGATGTCTCCTGCTGAGGAAG    |
| Tyr-GTA-5-3 | Tyr-GTA-5-F   | CCTTCGATAGCTCAGCTGGT     |
|             | Tyr-GTA-5-3-R | GGATGTCCACAAATGTTTCTACAG |

**qPCR control gene primers**

| Primer name     | Sequence 5' --> 3'   |
|-----------------|----------------------|
| Human b-actin F | GATCATTGCTCCTCCTGAGC |
| Human b-actin R | ACTCCTGCTTGCTGATCCAC |
