# Supplementary material
Source: PubMed Central journal article supplement (PMC5600857)
Supplement: NIHMS894836-supplement-3.pdf [file NIHMS894836-supplement-3.pdf]

**Supplementary Table 2. Northern blot DNA probe sequences.**

| Target tRNA         | Sequence 5' --> 3'                    |
|---------------------|---------------------------------------|
| Arg-TCT             | TAGAAGTCCAATGCGCTATCCATTGCGCCACAGAGCC |
| Ile-AAT/GAT         | ATTAGCACCCACGCTCTAACCAACTGAGCTAACCGG  |
| Leu-CAA             | CTTGAGTCTGGCGCCTTAGACCACTCGGCCATCCT   |
| iMet-CAT            | CAGCACGCTTCCGCTGCGCCACTCTG            |
| Met-CAT             | CTCAGGACCTTCAGATTATGAGACTGACGCGC      |
| Tyr-GTA             | CTACAGTCCTCCGCTCTACCAACTGAGCTATCGAAG  |
| 5.8S rRNA (control) | CTAGCTGCGTTCTTCATCGACGCACGAGCCGAG     |
