# Supplementary material
Source: PubMed Central journal article supplement (PMC5600857)
Supplement: NIHMS894836-supplement-4.pdf [file NIHMS894836-supplement-4.pdf]

Supplementary Table 3. Mass spectrometry total spectral counts for PR association with Pol III holoenzyme subunits.

| Gene    | UCD4 |     |                 |    | UCD65 |     |     |    |
|---------|------|-----|-----------------|----|-------|-----|-----|----|
|         | IP:  |     | IP:             |    | IP:   |     | IP: |    |
|         | IgG  | IgG | PR              | PR | IgG   | IgG | PR  | PR |
| POLR3A  | 0    | 0   | 70 <sup>1</sup> | 95 | 0     | 0   | 22  | 16 |
| POLR3B  | 0    | 0   | 33              | 49 | 0     | 0   | 8   | 8  |
| POLR3C  | 0    | 0   | 22              | 29 | 0     | 0   | 4   | 6  |
| POLR3D  | 0    | 0   | 12              | 13 | 0     | 0   | 4   | 9  |
| POLR3E  | 0    | 0   | 20              | 37 | 0     | 0   | 5   | 3  |
| POLR3F  | 0    | 0   | 8               | 8  | 0     | 0   | 0   | 0  |
| POLR3GL | 0    | 0   | 0               | 2  | 0     | 0   | 0   | 0  |
| POLR3H  | 0    | 0   | 0               | 1  | 0     | 0   | 0   | 0  |
| POLR3K  | 0    | 0   | 4               | 4  | 0     | 0   | 0   | 0  |
| CRCP    | 0    | 0   | 8               | 14 | 0     | 0   | 2   | 0  |
| POLR1C  | 0    | 0   | 13              | 19 | 0     | 0   | 3   | 4  |
| POLR1D  | 0    | 0   | 2               | 2  | 0     | 0   | 0   | 0  |
| POLR2E  | 0    | 0   | 4               | 5  | 0     | 0   | 0   | 0  |
| POLR2H  | 1    | 0   | 0               | 1  | 0     | 0   | 2   | 0  |
| POLR2L  | 0    | 0   | 0               | 1  | 0     | 0   | 0   | 0  |

Duplicate UCD4 and UCD65 tumors grown with E2 plus MPA were analyzed using ActiveMotif's (Carlsbad, CA) rapid immunoprecipitation followed by mass spectrometry (RIME) services for PR. Total spectral counts were determined using 95% probability and 2 peptide minimum using Scaffold software (Portland, OR). <sup>1</sup>Gray shade indicates 95% probability of sequence identity.
